# Supplementary material for: Estimating the Cost of Care for Emergency Department Syncope Patients: Comparison of Three Models
Source: PubMed Central journal article supplement (PMC5305134; doi:10.5811/westjem.2016.10.31171), 2017-01-20
Supplement: wjem-18-253-s001.pdf [file wjem-18-253-s001.pdf]

**Appendix A: Methods for estimating total hospital costs for patients presenting with syncope.**

Total estimated costs = Direct costs of tests + Facility costs

Direct costs of tests: Sum of the unadjusted payment rates for tests per Center for Medicare and Medicaid Ambulatory Payment Classifications payments.

Facility costs: Three methods for estimating facility costs (V1, V2, V3):

|                                                                        | <b>Discharged</b>  | <b>Admit to Observation</b>                                          | <b>Admit to Inpatient</b>                                            |
|------------------------------------------------------------------------|--------------------|----------------------------------------------------------------------|----------------------------------------------------------------------|
| <b>Source</b>                                                          | EM Level 5 APC 616 | Extended Assessment & Management (Observation) APC 8009              | DRG Syncope & Collapse, Average Medicare Payment                     |
| <b>Cost</b>                                                            | \$492.69           | \$1,234.70                                                           | \$5,575.16                                                           |
| <b>V1: Medicare Payment</b>                                            | \$492.69           | \$1,234.70                                                           | \$5,575.16                                                           |
| <b>V2: Modified Medicare Payment, Prorated by LOS in Calendar Days</b> | \$492.69           | \$1,234.70 * total LOS in calendar days                              | \$1,234.70 * total LOS in calendar days                              |
| <b>V3: Modified Medicare Payment, Prorated by LOS in Hours</b>         | \$492.69           | \$1,234.70/mean total LOS for patients in observation * LOS in hours | \$1,234.70/mean total LOS for patients in observation * LOS in hours |

APC: Ambulatory Payment Classifications. DRG: Diagnosis Related Group. LOS: Length Of Stay.
