# Supplementary material for: Estimating the Cost of Care for Emergency Department Syncope Patients: Comparison of Three Models
Source: PubMed Central journal article supplement (PMC5305134; doi:10.5811/westjem.2016.10.31171), 2017-01-20
Supplement: wjem-18-253-s002.pdf [file wjem-18-253-s002.pdf]

**Appendix B: Characteristics of patients presenting to the emergency department with syncope.**

| <b>N=67</b>                                           | <b>Number (percent)</b> |
|-------------------------------------------------------|-------------------------|
| <b>Age (in years, mean (range))</b>                   | 73.4 (60-98)            |
| <b>Male gender (%):</b>                               | 37 (55.2%)              |
| <b>Race:</b>                                          |                         |
| White or Caucasian                                    | 60 (89.6%)              |
| Black or African American                             | 3 (4.5%)                |
| Asian (Asian Indian, Filipino, Japanese, Other Asian) | 1 (1.5%)                |
| American Indian or Alaskan Native                     | 1 (1.5%)                |
| Refused                                               | 1 (1.5%)                |
| Multiracial                                           | 1 (1.5%)                |
| <b>Commonly Ordered Diagnostic Tests (%):</b>         |                         |
| -Chest X-ray                                          | 46 (68.7%)              |
| -CT Head                                              | 25 (37.3%)              |
| -Rest Echocardiogram                                  | 20 (29.9%)              |
| -Troponin                                             | 65 (97.0%)              |
| -Carotid Ultrasound                                   | 9 (13.4%)               |
| -Event Monitor                                        | 6 (9.0%)                |
| <b>Disposition:</b>                                   |                         |
| -Direct discharge from ED                             | 21 (31.3%)              |
| -Observation status                                   | 42 (62.7%)              |
| -Admit to hospital                                    | 4 (6.0%)                |

| <b>Length of stay (in hours):</b> | <b>Median (range)</b> |
|-----------------------------------|-----------------------|
| -All patients                     | 18.9 (1.9-85.8)       |
| -Direct discharge from ED         | 4.5 (1.9-7.3)         |
| -Observation status               | 23.5 (4.0-72.3)       |
| -Admit to hospital                | 37.2 (5.3-85.8)       |

ED: Emergency Department, CT: Computed Tomography.
